1 **COVID-19 trends in Colombian regions with the highest disease burden**

2

3 Pablo Chaparro<sup>1\*</sup>, Helmer Zapata<sup>2</sup>, Isabel Hurtado<sup>2</sup>, Alberto Alzate<sup>3,4</sup>,

4 Maria Cristina Lesmes<sup>2</sup>, Sócrates Herrera<sup>4,5\*</sup>

5

6

7

8

9

10 <sup>1</sup> Instituto Nacional de Salud, Bogotá, Colombia

11 <sup>2</sup> Secretaría Departamental de Salud, Cali, Colombia

12 <sup>3</sup> School of Health, Universidad Libre, Cali, Colombia

13 <sup>4</sup> Centro de Investigación Científica Cauceseco, Cali, Colombia

14 <sup>5</sup> Comité Público Privado de Expertos en Salud - COPESA, Cali, Colombia

15

16

17

18 **Corresponding author**

19 Pablo Chaparro

20 Instituto Nacional de Salud, Bogotá, Colombia

21 Email: pechaparro@yahoo.es

22 **Abstract**

23 **Introduction:** COVID-19 pandemic is currently the most significant global public  
24 health challenge, with more than 31 million cases reported to date. Colombia first  
25 reported COVID-19 cases in the country by early March 2020, and six months later  
26 it has reached ~750,471 clinical cases, with significant regional differences in  
27 morbidity, mortality, and hospitalization rates.

28 **Aims:** Identify population characteristics and hospital capacity in the 13  
29 municipalities with the highest disease notification and examine differences in  
30 cumulative reported cases, hospitalization, and mortality rates that may explain the  
31 regional differences.

32 **Materials and methods:** A multi-group ecological study was performed based on  
33 the information available from public databases. Notification of cases,  
34 hospitalization, and crude mortality and age-adjusted rates were calculated.

35 **Results:** The municipalities with the highest COVID-1 burden at different times  
36 during the study period displayed significant differences in population density and  
37 the proportion of elderly inhabitants, indigenous and afro descendants minorities;  
38 indices of unsatisfied basic needs and multidimensional poverty index, as well as the  
39 number of hospital beds. Likewise, essential variations in notification rates,  
40 hospitalization, and mortality were observed. The highest age-adjusted of reported  
41 cases (4,219 cases) and mortality (230.4 cases) rates were found in Leticia, the  
42 lowest general hospitalization rates in Buenaventura (37.5 cases) and the lowest  
43 ICU hospitalization rates (0) in Leticia and Tumaco due to a lack of these units in  
44 these municipalities.

45 **Conclusion:** The probability of getting sick, hospitalized, and dying from COVID-  
46 19 appeared closely related to socio-economic, ethnic, and cultural characteristics,  
47 and also to hospital bed capacity.

48

49 **Keywords** coronavirus infections, morbidity, hospitalization, mortality, infections,  
50 Colombia

51

## 52 **Introduction**

53 Currently, COVID-19 pandemics represent the most significant health challenge for  
54 humanity, with ~31 million clinical cases reported to date (Sept 22, 2020) and  
55 ~965,000 deaths in 235 countries worldwide (1,2). The disease is produced caused  
56 by SARS-CoV-2, a coronavirus that induces a pleomorphic and broad range of  
57 clinical manifestations. Infected subjects may evolve without symptoms  
58 (asymptomatic) or develop mild, severe, and critical clinical cases frequently leading  
59 to death, particularly in elder patients with some comorbidities i.e. hypertension,  
60 cardiovascular disorders, diabetes, obesity, cancer, among other pathologies (3).  
61 The virus reached Colombia by early March 2020. A week later, the national  
62 government declared an almost full nationwide lockdown, except for essential  
63 services including the food industry and markets, pharmacies, and banks. Although  
64 the prompt lockdown significantly delayed SARS-CoV2 dissemination, fifteen days  
65 after virus entry in Colombia it caused the first COVID-19 death.

66

67 Initially, government efforts to provide early diagnosis, hospital facilities, and  
68 personal protective equipment (PPE) faced a severe global shortage of equipment,  
69 supplies, reagents, and adequate preparedness with confronting the COVID-19  
70 challenge; therefore, a full lockdown was almost the only effective alternative. Total  
71 lockdown officially extended for about two months. As expected, its economic impact  
72 prompted the initiation on May 4 of gradual reopening, which has been associated  
73 with an immediate and progressive increase in the number of cases and deaths. As  
74 of September 18, a total of 750,471 confirmed cases and 23,850 deaths have been  
75 reported. During the first three months, 77,2% of the COVID-19 cases occurred in

76 ten municipalities located in well-defined regions across the country: Bogotá,  
77 Cartagena, Cali, Barranquilla, Medellín, Leticia, Soledad, Villavicencio, Tumaco, and  
78 Buenaventura; however, during the last three months, Montería, Valledupar, and  
79 Bucaramanga replaced Leticia, Tumaco, and Buenaventura. In this second phase,  
80 the new top ten municipalities, each with its own geographic, demographic, social,  
81 economic, and cultural characteristics, accounted for 63.2% of the cases.  
82 Here, we report analyses focused on the characteristics of the most affected  
83 populations and hospital beds capacity in the top ten municipalities that have  
84 reported the highest number of COVID-19 cases to date, and examine reported case  
85 rates, hospitalizations and mortality between March 6 and September 18, 2020.

86

## 87 **Materials and Methods**

88 Type of study: A multi-group ecological analysis was performed based on the  
89 information available from public databases on morbidity, mortality, and hospital bed  
90 availability.

91 Geographical coverage: The thirteen study municipalities are broadly dispersed  
92 across the Colombian national geography. Barranquilla, Soledad, Montería,  
93 Valledupar, and Cartagena are located in the northern region on the Caribbean  
94 coast, whereas Cali, Buenaventura, and Tumaco are in the western part, close or on  
95 the Pacific coast region. Bogotá, Bucaramanga, and Medellín are in the Andean  
96 zone, whereas Villavicencio is in the Eastern region, and Leticia in the southernmost  
97 town on the Amazon river (Figure 1).

98 Information sources: The 2018 Colombian national census conducted by the  
99 Departamento Administrativo Nacional de Estadísticas (DANE) was used to

100 describe the characteristics of the population of each of the study municipalities (4).  
101 The indices of Unsatisfied Basic Needs (UBN) (4) and the multidimensional poverty  
102 measure (MPI) of each municipality (5) were used to determine the level of socio-  
103 economic vulnerability. The Special Registry of Health Service Providers (SRHSP;  
104 June 5 and September 18) of the Ministry of Health and Social Protection (MSP),  
105 was used to identify the capacity of hospital beds (6); and the open Data Bases of  
106 the Ministry of Information and Communications Technologies (MICT), Colombian  
107 (June 5 and September 18), were used to establish the number of people diagnosed  
108 with COVID-19, those who became ill, hospitalized and died, by municipality (7).

109 Variables: municipality, total population, and population density, the average number  
110 of people per household, age median, older than 64 years, sex, ethnic self-  
111 recognition, socio-economic status, educational level, marital status, beds per  
112 100,000 inhabitants, number of cases, dates of symptoms onset and deaths, age  
113 and medical care.

114 Data analyses: The information obtained was processed in Microsoft Excel  
115 spreadsheets and analyzed with the Stata Version 12 program. COVID-19 frequency  
116 and percentage, as well as notification, mortality and hospitalization were estimated.  
117 The crude and age-adjusted rates of COVID-19 reports and mortality were analyzed;  
118 likewise, hospitalization rates were assessed. All rates were expressed per 100,000  
119 inhabitants. For the adjustment of notification and mortality rates by age, the direct  
120 methods were considered using the World Health Organization (WHO) standard  
121 population as reference (8). Spearman correlation coefficients between mortality  
122 adjusted rate, and each of the socio-economic indicators, health providers, and  
123 hospital beds were calculated.

124

## 125 **Results**

126 The Colombian population is estimated as 50,372,424 inhabitants (9), 36.4% of  
127 whom are in the municipalities analyzed between March and September. Population  
128 density varied between 9 inhabitants/km<sup>2</sup> in Leticia (Amazon) and 9,926  
129 inhabitants/km<sup>2</sup> in Soledad (Caribbean). The proportion of people older than 64  
130 years was highest in Cali (11.6%) and lowest in Leticia (4.3%). The indigenous  
131 population was highest in Leticia (42.5%), whereas the Afro-descendant population  
132 was predominant in Buenaventura (85.3%) and Tumaco (81.5%) located on the  
133 Pacific coast. Both UBN and MPI were highest in Tumaco (27.5% and 53.7%,  
134 respectively), and lowest in Bogotá (3.4% and 9.0%, respectively) (Table 1). The  
135 number of ICU beds per 100,000 inhabitants was highest in Valledupar (78.6 beds),  
136 whereas Leticia and Tumaco did not have any (0 beds) during most of the study  
137 period (Table 2). There was a significant variation in the adjusted notification of  
138 COVID-19 among the study municipalities; it was highest in Leticia (4,219 cases)  
139 and lowest in Medellín (26.6 cases) (Figure 2). The age-adjusted COVID-19 mortality  
140 rate was highest in Leticia (230.4) and lowest in Medellín (36.6) (Figure 2).

141

142 **Legend Fig 2;** COVID-19 reported cases from March-September are shown for the  
143 top 10 municipalities for March-June (**A**) and March-September (**D**); hospitalizations  
144 are shown for March-June (**B**) and March-September (**E**); and deaths for March-  
145 June (**C**) and March-September (**F**). (Data from DANE, SRHSP, MSP, MICT).

146 (MICT), Colombian (June 5 and September 18), were used to establish the number  
147 of people diagnosed with COVID-19, those who became ill, hospitalized and died,  
148 by municipality (7).

149

150 The Leticia, Buenaventura, and Tumaco municipalities displayed case peaks  
151 between March and June (Figure 3). In contrast, for Bogotá, Medellín, Cali,  
152 Barranquilla, Soledad, Montería, Valledupar, and Bucaramanga the peak was  
153 between June and September. In comparison, Cartagena and Villavicencio  
154 presented peaks between March and September. Spearman correlation indicated a  
155 statistical significance between the adjusted rate of mortality and case notification,  
156 population, age median age, percentage of population older than 65 years, another  
157 ethnic group (white/mestizo), education level superior and no education, UBN, MPI  
158 and number of health services providers, whereas between March and September  
159 it correlated only with having a partner (Table 3).

160

161

162

## 163 **Discussion**

164 Despite the government's efforts and the remarkable contribution of the population  
165 to the individual recommended protective measures such as social distancing and  
166 mask usage, and the general closedown, currently Colombia is the sixth country with  
167 the highest morbidity and eleventh in mortality attributed to COVID-19 worldwide (1).  
168 Regardless of severity, during a pandemic the burden on health services is great



169 and exposes any weakness of the system (10). Furthermore, maintaining  
170 sustainable critical care services is a crucial consideration for the health system (11).  
171 The analyses reported in this study revealed significant variations in the notification  
172 of both general and ICU hospitalizations and mortality rates in the most affected  
173 municipalities during the six months study period. Whereas Leticia, with the highest  
174 proportion of the indigenous population with the highest MPI, displayed one of the  
175 highest rates of COVID-19 hospitalization and death rates, Medellín showed the  
176 lowest notification and mortality rates. These differences correlate with the socio-  
177 economic conditions of both municipalities. In Leticia, a large part of the indigenous  
178 population has a high degree of socio-economic marginalization, living in distant and  
179 isolated areas of the Amazon forest region, and communities are exposed to several  
180 factors that endanger their health status (12). In this region, search for medical care  
181 demands traveling long distances, usually using primitive, inefficient, and expensive  
182 transportation means, which are consequently time-consuming, notably affecting  
183 subsistence and loss of work. These hurdles result in increased time between  
184 symptoms onset and adequate medical care, which is usually provided in primitive  
185 health service conditions (13). Although the isolation of these communities from the  
186 main population center of Colombia likely delayed the arrival of COVID-19, its  
187 proximity to Tabatinga, the closest town on the Brazilian border, and Santa Rosa de  
188 Yavari on the Peruvian border, might have accelerated the disease (virus) arrival to  
189 this isolated region where health infrastructure was not prepared for the pandemic.  
190 Second, people were skeptical about the real danger of the disease (14).  
191 When comparing the municipalities of the Caribbean (Cartagena, Barranquilla and  
192 Soledad) and the Pacific (Buenaventura and Tumaco) coasts, remarkable

193 differences were also observed. While the Caribbean has a high population density,  
194 better socio-economic conditions, and better hospital infrastructure, the Pacific  
195 region is populated by Afro-descendant minorities, traditionally affected by poverty  
196 (15) with poor housing infrastructure, malnutrition and limited access to health care  
197 (16,17). Afro-descendant communities are predominant in the Pacific regions. It is  
198 also possible that the difference due to ethnic self-recognition is attributable to the  
199 access that this population may have to care in health services (18); however, the  
200 concept of ethnicity is linked to its own historical, political, and social baggage (19).  
201 In general, biological susceptibility, geographic, socio-economic, and cultural  
202 factors, along with pre-existing health conditions and access to medical care, can  
203 help explain the higher rates of infection and death in people of African descent  
204 (19,20). On the other hand, indigenous populations are predominant in the Amazon  
205 and Pacific regions. Both minorities displayed significantly more cases than mestizo  
206 populations predominant in the rest of the country.

207 The differences in morbidity and mortality due to COVID-19, associated with  
208 economic and social conditions, have been described in racial and ethnic North  
209 American minorities (21). Social, economic, and cultural differences reported here  
210 are similar to those presented by Wadhwa et al., who found that ethnic minorities  
211 living in poverty in New York, who have a low educational level, had higher COVID-  
212 19 hospitalization and related mortality (22). Furthermore, in Colombia another  
213 study that evaluated the influence of poverty and inequity on COVID-19 found that  
214 the income losses induced by the closedown affected significantly more the  
215 vulnerable sectors (23).

216 Regarding the provision of health services, there was a great variation in those of  
217 general hospitalization and ICU hospitalization in the 13 municipalities. Much of the  
218 variation could be related to NBI and MPI levels. This variation in the provision of  
219 health services occurred both within and between municipalities. In the last month  
220 efforts have been made to minimize these variations aimed at guaranteeing  
221 adequate access for the entire population and avoiding the excessive use of  
222 potentially expensive resources.

223 The results presented here should be interpreted with caution. These are partial  
224 results prior to September 18, 2020; these trends may be currently changing  
225 according to the evolution of the disease in the population. As for hospital and ICU  
226 services, this study was an attempt to measure their supply. It is possible that the  
227 municipalities where the greatest burden of the disease was reported are not the  
228 most representative of the socio-economic conditions of the regions to which they  
229 belong. In conclusion, the probability of getting sick, hospitalization, and death from  
230 COVID-19 between municipalities may be related to socio-economic characteristics  
231 and the local capacity of hospital beds. Populations with worse conditions bear the  
232 greatest burden of disease. The results presented can contribute to data-based  
233 decision-making related to the availability of health services affected by morbidity  
234 and mortality due to COVID-19 and, in particular, the optimal capacity of hospital  
235 services and ICUs.

236

### 237 **Conflict of interest statement**

238 The authors declare no conflicts of interest.

239

240 **Financing**

241 This work was carried out with operating resources from the National Health  
242 Observatory of the National Health Institute, Gobernación del Valle and Caucesco  
243 SRC.

244

245 **References**

1. Johns Hopkins University. COVID-19 Dashboard by the Center for Systems Science and Engineering (CSSE) at Johns Hopkins University (JHU) [Internet]. 2020 [cited 2020 Sep 22]. Available from: <https://coronavirus.jhu.edu/map.html>
2. WHO. Coronavirus disease (COVID-19) pandemic [Internet]. 2020 [cited 2020 Sep 22]. Available from: <https://www.who.int/emergencies/diseases/novel-coronavirus-2019>
3. Zhou Y, Yang Q, Chi J, Dong B, Lv W, Shen L, et al. Comorbidities and the risk of severe or fatal outcomes associated with coronavirus disease 2019: A systematic review and meta-analysis. *Int J Infect Dis* [Internet]. 2020;99:47–56. Available from: <https://doi.org/10.1016/j.ijid.2020.07.029>
4. Departamento Administrativo Nacional de Estadística (DANE). Censo nacional de población y vivienda 2018 [Internet]. 2018 [cited 2020 Jun 6]. Available from: <https://www.dane.gov.co/index.php/estadisticas-por-tema/demografia-y-poblacion/censo-nacional-de-poblacion-y-vivenda-2018>
5. Departamento Administrativo Nacional de Estadística (DANE). Medida de pobreza multidimensional municipal de fuente censal 2018 [Internet]. 2018 [cited 2020 Jun 6]. Available from:

<https://www.dane.gov.co/index.php/estadisticas-por-tema/pobreza-y-condiciones-de-vida/pobreza-y-desigualdad/medida-de-pobreza-multidimensional-de-fuente-censal>

6. Ministerio de Salud y Protección Social. Registro Especial de Prestadores de Servicios de Salud [Internet]. 2020 [cited 2020 Sep 18]. Available from: <https://prestadores.minsalud.gov.co/habilitacion/>
7. Ministerio de Tecnologías de la Información y las Comunicaciones. Casos positivos de COVID-19 en Colombia [Internet]. 2020 [cited 2020 Sep 18]. Available from: <https://www.datos.gov.co/Salud-y-Proteccion-Social/Casos-positivos-de-COVID-19-en-Colombia/gt2j-8ykr>
8. Ahmad OB, Boschi-Pinto C, Lopez AD, Murray CJL, Lozano R, Inoue M. Age standardization of rates: a new WHO standard [Internet]. GPE Discussion Paper Series. 2001. p. 1–14. Available from: <http://www.who.int/healthinfo/paper31.pdf>
9. DANE. Proyecciones y retroproyecciones de población [Internet]. 2020 [cited 2020 Sep 9]. Available from: <https://www.dane.gov.co/index.php/estadisticas-por-tema/demografia-y-poblacion/proyecciones-de-poblacion>
10. Fisher D, Hui DS, Gao Z, Lee C, Oh MD, Cao B, et al. Pandemic response lessons from influenza H1N1 2009 in Asia. *Respirology*. 2011;16(6):876–82.
11. Goh KJ, Wong J, Tien JCC, Ng SY, Duu Wen S, Phua GC, et al. Preparing your intensive care unit for the COVID-19 pandemic: practical considerations and strategies. *Crit Care*. 2020;24(1):215.
12. Montenegro RA, Stephens C. Indigenous health in Latin America and the Caribbean. *Lancet*. 2006;367(9525):1859–69.

13. Department of Economics and Social Affairs. Pueblos indígenas y la pandemia del covid-19: consideraciones [Internet]. 2020. Available from: [https://www.un.org/development/desa/indigenouspeoples/wp-content/uploads/sites/19/2020/04/COVID\\_IP\\_considerations\\_Spanish.pdf](https://www.un.org/development/desa/indigenouspeoples/wp-content/uploads/sites/19/2020/04/COVID_IP_considerations_Spanish.pdf)
14. United Nations. Departamento de Asuntos Económicos y Sociales. Los Pueblos Indígenas y el COVID-19 [Internet]. 2020 [cited 2020 May 20]. Available from: <https://www.un.org/development/desa/indigenous-peoples/covid-19.html>
15. Firebaugh G, Acciai F. For blacks in America, the gap in neighborhood poverty has declined faster than segregation. *Proc Natl Acad Sci U S A*. 2016;113(47):13372–7.
16. Copeland VC. African Americans: Disparities in health care access and utilization. *Heal Soc Work*. 2005;30(3):265–70.
17. Yancy CW. COVID-19 and African Americans. *JAMA - J Am Med Assoc*. 2020;60611:6–7.
18. American College of Physicians. Racial and ethnic disparities in health care, updated 2010 [Internet]. Philadelphia; 2010. Available from: [https://www.acponline.org/acp\\_policy/policies/racial\\_ethnic\\_disparities\\_2010.pdf](https://www.acponline.org/acp_policy/policies/racial_ethnic_disparities_2010.pdf)
19. Oppenheimer GM. Paradigm lost: Race, ethnicity, and the search for a new population taxonomy. *Am J Public Health*. 2001;91(7):1049–55.
20. Wise J. Covid-19: Known risk factors fail to explain the increased risk of death among people from ethnic minorities. *BMJ [Internet]*. 2020;369(May):m1873. Available from: <http://dx.doi.org/doi:10.1136/bmj.m1873>

21. Centers for Disease Control (CDC). COVID-19 in Racial and Ethnic Minority Groups [Internet]. 2020 [cited 2020 May 28]. Available from: <https://www.cdc.gov/coronavirus/2019-ncov/need-extra-precautions/racial-ethnic-minorities.html>
22. Wadhera RK, Wadhera P, Gaba P, Figueroa JF, Joynt Maddox KE, Yeh RW, et al. Variation in COVID-19 Hospitalizations and Deaths across New York City Boroughs. *JAMA - J Am Med Assoc.* 2020;1–3.
23. CEDE. Efectos en pobreza y desigualdad del Covid-19 en Colombia: un retroceso de dos décadas. 2020;(20):1–4.

**Table 1.** Descriptive characteristics of the municipalities with the highest number of COVID-19 cases in Colombia during the period March – September, 2020

|                                        | Bogotá    | Medellin  | Barranquilla | Cali      | Cartagena | Soledad | Monteria | Valledupar | Bucaramanga | Villavicencio | Leticia | Tumaco  | Buenaventura |
|----------------------------------------|-----------|-----------|--------------|-----------|-----------|---------|----------|------------|-------------|---------------|---------|---------|--------------|
| Population                             | 7,743,955 | 2,533,424 | 1,274,250    | 2,252,616 | 1,028,736 | 665,021 | 505,334  | 532,956    | 607,428     | 545,302       | 49,737  | 257,052 | 311,827      |
| Population density                     | 4,360     | 6,546     | 7,676        | 4,081     | 1,840     | 9,926   | 161      | 118.6      | 3,750       | 411           | 9       | 68      | 52           |
| Average number of people per household | 2.8       | 2.9       | 3.7          | 3.0       | 3.4       | 3.7     | 3.3      | 3.6        | 3.0         | 2.96          | 3.65    | 3.01    | 3.46         |
| Median Age                             | 32.0      | 33.0      | 31.0         | 34.0      | 29.0      | 28.0    | 29.0     | 26.0       | 33.0        | 30.0          | 22.0    | 24.0    | 26.0         |
| Population aged 65 and over (%)        | 8.9       | 10.6      | 9.7          | 11.6      | 7.9       | 6.3     | 7.6      | 6.2        | 10.5        | 7.6           | 4.3     | 6.3     | 6.4          |
| <b>Gender (%)</b>                      |           |           |              |           |           |         |          |            |             |               |         |         |              |
| Male                                   | 47.8      | 47.0      | 47.9         | 46.8      | 48.1      | 48.7    | 48.51    | 48.71      | 47.5        | 49.3          | 51.5    | 48.9    | 47.4         |
| Female                                 | 52.2      | 53.0      | 52.1         | 53.2      | 51.9      | 51.3    | 51.49    | 51.29      | 52.5        | 50.7          | 48.5    | 51.1    | 52.6         |
| <b>Ethnic self-recognition (%)</b>     |           |           |              |           |           |         |          |            |             |               |         |         |              |
| Indigenous                             | 0.27      | 0.09      | 0.11         | 0.52      | 0.15      | 0.08    | 0.71     | 6.81       | 0.05        | 0.36          | 42.51   | 8.71    | 1.52         |
| Gypsy or Roma                          | 0.01      | 0.00      | 0.00         | 0.00      | 0.00      | 0.00    | 0.00     | 0.00       | 0.00        | 0.00          | 0.01    | 0.01    | 0.01         |
| Raizal                                 | 0.01      | 0.01      | 0.02         | 0.02      | 0.05      | 0.01    | 0.01     | 0.02       | 0.01        | 0.01          | 0.03    | 0.03    | 0.02         |
| Palenquero(a) de San Basilio           | 0.00      | 0.00      | 0.06         | 0.01      | 0.16      | 0.02    | 0.00     | 0.01       | 0.00        | 0.00          | 0.00    | 0.01    | 0.01         |
| Black, mulatto, Afro-descendant        | 0.91      | 2.49      | 5.12         | 14.41     | 20.04     | 1.29    | 1.69     | 7.19       | 1.57        | 0.92          | 0.86    | 81.47   | 85.25        |
| Other ethnic group                     | 96.8      | 96.1      | 93.5         | 83.6      | 78.7      | 97.4    | 96.77    | 84.54      | 96.9        | 95.82         | 53.94   | 5.00    | 11.54        |
| Does not report                        | 2.0       | 1.3       | 1.2          | 1.4       | 0.9       | 1.2     | 0.82     | 1.43       | 1.4         | 2.88          | 2.66    | 4.77    | 1.66         |
| <b>Education level (%)</b>             |           |           |              |           |           |         |          |            |             |               |         |         |              |
| Primary                                | 21.3      | 24.9      | 23.7         | 23.8      | 25.1      | 25.3    | 29.0     | 28.2       | 26.0        | 26.8          | 31.7    | 37.3    | 32.3         |
| High School                            | 39.6      | 44.1      | 42.9         | 44.8      | 45.9      | 48.3    | 41.5     | 40.8       | 39.4        | 41.6          | 48.2    | 44.1    | 52.8         |
| Higher                                 | 35.0      | 27.0      | 29.7         | 27.7      | 24.9      | 23.0    | 23.5     | 24.4       | 30.5        | 25.3          | 13.1    | 5.9     | 7.9          |
| None                                   | 1.6       | 2.4       | 2.2          | 2.0       | 2.8       | 2.3     | 4.9      | 4.9        | 2.4         | 2.7           | 3.0     | 7.5     | 4.8          |
| Does not report                        | 2.4       | 1.6       | 1.5          | 1.7       | 1.2       | 1.1     | 1.2      | 1.7        | 1.8         | 3.6           | 3.9     | 5.2     | 2.2          |
| <b>Marital status (%)</b>              |           |           |              |           |           |         |          |            |             |               |         |         |              |
| With couple                            | 44.3      | 40.9      | 47.9         | 44.7      | 48.7      | 50.9    | 49.6     | 47.2       | 45.6        | 45.6          | 44.1    | 43.5    | 45.3         |
| Single                                 | 53.8      | 57.7      | 50.8         | 53.9      | 50.2      | 48.2    | 49.6     | 51.5       | 52.9        | 51.1          | 49.9    | 51.4    | 52.7         |
| Does not report                        | 2.0       | 1.4       | 1.3          | 1.4       | 1.1       | 0.9     | 1.0      | 1.4        | 1.5         | 3.2           | 6.0     | 5.1     | 2.0          |
| <b>Socio-economic status (%)</b>       |           |           |              |           |           |         |          |            |             |               |         |         |              |
| UBN                                    | 3.4       | 5.2       | 9.1          | 4.1       | 12.4      | 8.0     | 18.6     | 17.7       | 5.4         | 6.3           | 27.0    | 27.5    | 16.6         |
| MPI                                    | 9         | 12.8      | 17.4         | 11.9      | 19.9      | 18.6    | 27.1     | 30.5       | 14.2        | 15.9          | 48,4    | 53.7    | 41.0         |



**Table 2.** Availability of health services and hospital beds in Colombia, March–September, 2020

|               | March - June                  |                                  |                                                     |                                       | March - September             |                                  |                                                     |                                       |
|---------------|-------------------------------|----------------------------------|-----------------------------------------------------|---------------------------------------|-------------------------------|----------------------------------|-----------------------------------------------------|---------------------------------------|
|               | # of health service providers | ICU beds per 100.000 inhabitants | Intermediate care unit beds per 100.000 inhabitants | Hospital beds per 100.000 inhabitants | # of health service providers | ICU beds per 100.000 inhabitants | Intermediate care unit beds per 100.000 inhabitants | Hospital beds per 100.000 inhabitants |
| Bogotá        | 96                            | 15.3                             | 7.6                                                 | 88.3                                  | 107                           | 28.7                             | 6.0                                                 | 94.3                                  |
| Medellin      | 47                            | 18.2                             | 12.9                                                | 127.1                                 | 41                            | 30.4                             | 10.7                                                | 130.9                                 |
| Barranquilla  | 63                            | 34.5                             | 20.4                                                | 181.2                                 | 60                            | 52.0                             | 20.5                                                | 177.8                                 |
| Cali          | 69                            | 27.6                             | 11.7                                                | 135.7                                 | 63                            | 37.2                             | 12.2                                                | 141.3                                 |
| Cartagena     | 46                            | 29.1                             | 17.2                                                | 128.1                                 | 34                            | 34.2                             | 16.5                                                | 127.9                                 |
| Soledad       | 15                            | 5.6                              | 4.5                                                 | 42.4                                  | 12                            | 8.7                              | 7.7                                                 | 38.2                                  |
| Villavicencio | 11                            | 11.9                             | 9.0                                                 | 90.6                                  | 11                            | 22.2                             | 7.0                                                 | 112.6                                 |
| Leticia       | 2                             | 0.0                              | 28.1                                                | 168.9                                 | 2                             |                                  |                                                     |                                       |
| Tumaco        | 3                             | 0.0                              | 2.3                                                 | 50.6                                  | 3                             |                                  |                                                     |                                       |
| Buenaventura  | 4                             | 3.2                              | 1.6                                                 | 37.5                                  | 4                             |                                  |                                                     |                                       |
| Monteria      |                               |                                  |                                                     |                                       | 27                            | 70.1                             | 29.7                                                | 222.6                                 |
| Valledupar    |                               |                                  |                                                     |                                       | 20                            | 78.6                             | 24.8                                                | 212.8                                 |
| Bucaramanga   |                               |                                  |                                                     |                                       | 16                            | 39.2                             | 14.5                                                | 141.3                                 |

**Table 3** Spearman correlation analyses

|                                                                           | March to June | March to September |
|---------------------------------------------------------------------------|---------------|--------------------|
| Adjusted reporting rate                                                   | 0.867*        | 0.455              |
| Population                                                                | -0.758*       | -0.418             |
| Population density                                                        | -0.600        | 0.018              |
| Average people per household                                              | 0.615         | 0.628              |
| Median Age                                                                | -0.830*       | -0.579             |
| Population aged 65 and over (%)                                           | -0.675*       | -0.541             |
| Male                                                                      | 0.442         | 0.383              |
| <b>Ethnic self-recognition</b>                                            |               |                    |
| Indigenous                                                                | 0.563         | 0.169              |
| Raizal of the Archipelago of San Andrés, Providencia and Santa Catalina   | 0.174         | -0.174             |
| Palenquero(a) de San Basilio                                              | 0.182         | 0.052              |
| Black, mulatto, Afro-descendant, Afro - Colombian                         | 0.411         | -0.103             |
| Another ethnic group (white, mestizos)                                    | -0.782*       | 0.103              |
| <b>Educational level (%)</b>                                              |               |                    |
| Primary                                                                   | 0.600         | 0.248              |
| High School                                                               | 0.553         | -0.115             |
| Higher                                                                    | -0.697*       | -0.370             |
| None                                                                      | 0.661*        | -0.518             |
| With couple                                                               | 0.018         | 0.742*             |
| <b>Economic indicators</b>                                                |               |                    |
| NBI                                                                       | 0.891*        | 0.576              |
| IPM                                                                       | 0.879*        | 0.552              |
| <b>Health service providers and hospital beds per 100,000 inhabitants</b> |               |                    |
| # of health service providers                                             | -0.661*       | -0.091             |
| ICU beds                                                                  | -0.486        | 0.358              |
| Intermediate Care Unit beds                                               | 0.018         | 0.467              |
| General hospital beds                                                     | 0.018         | 0.298              |

\*  $p < 0.05$

**Figure 1.** Municipalities with the highest COVID-19 burden for COVID-19.

Colombia, March-September, 2020

March – June

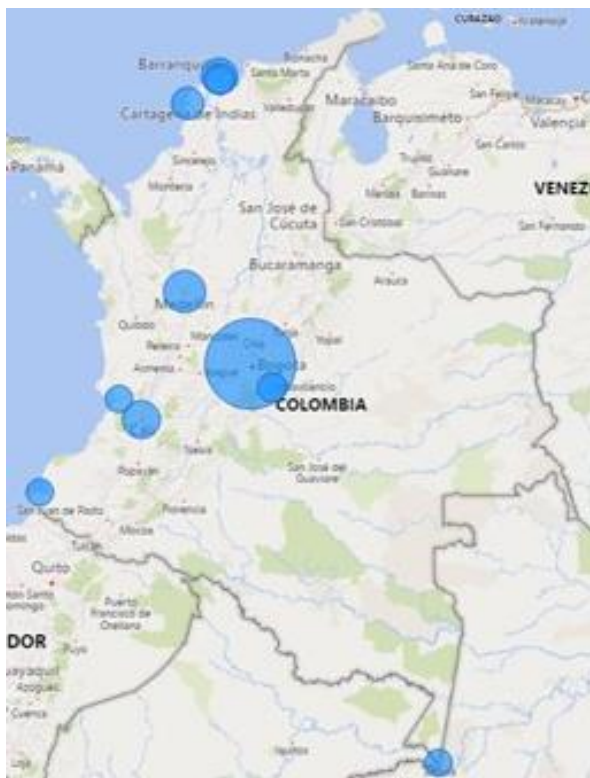

March - September

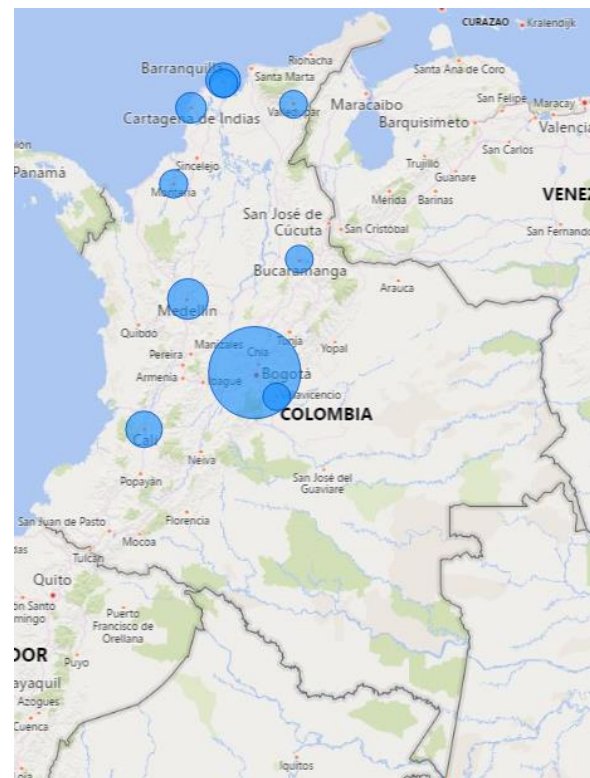

**Source:** Observatorio Nacional de Salud, Instituto Nacional de Salud

**Figure 2.** Notification of cases, hospitalizations, and deaths in municipalities with the highest COVID-19 burden between March and September 2020

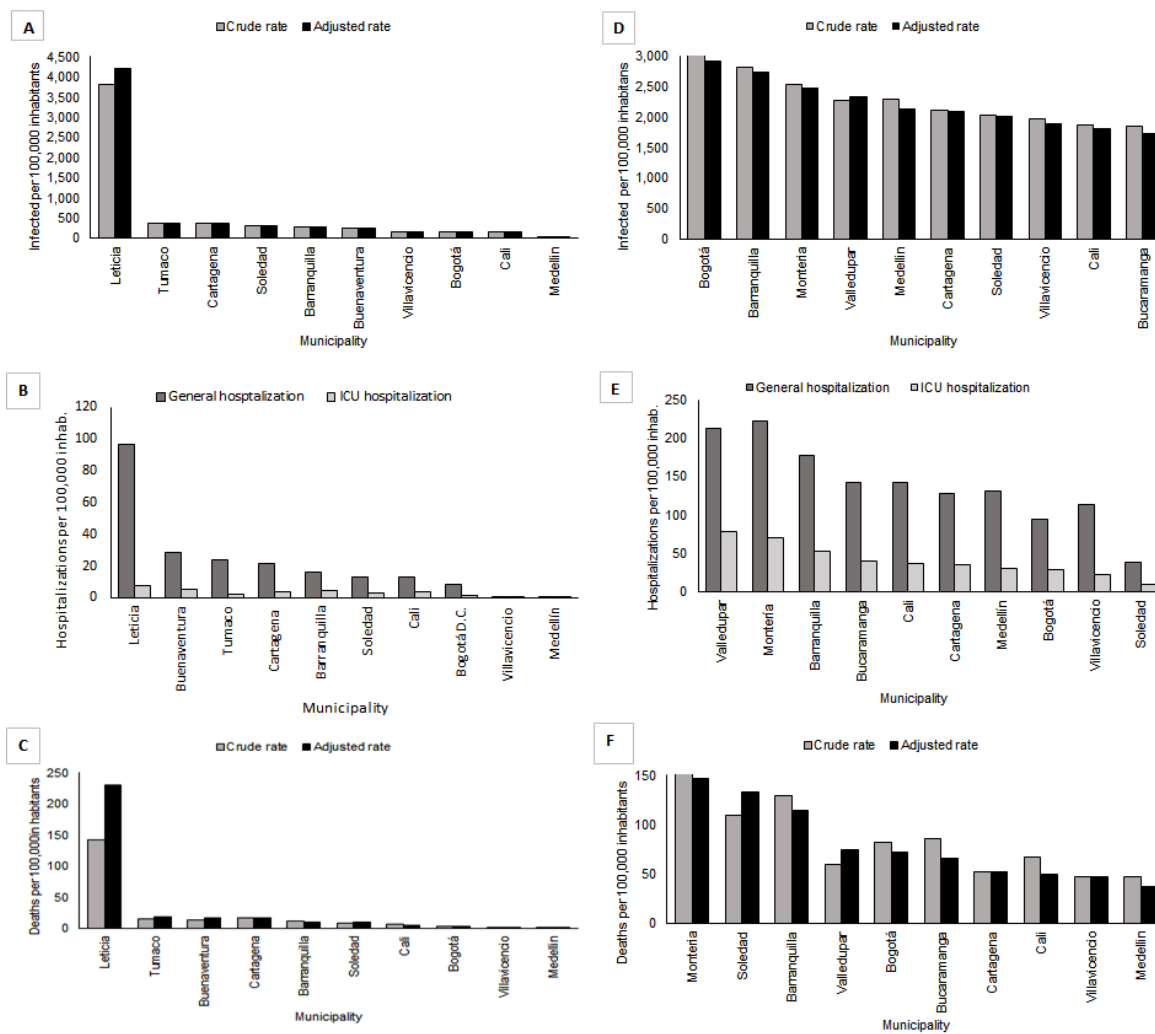

**Figure 3.** COVID-19 cases in Colombian municipalities with the highest burden

March-September 2020

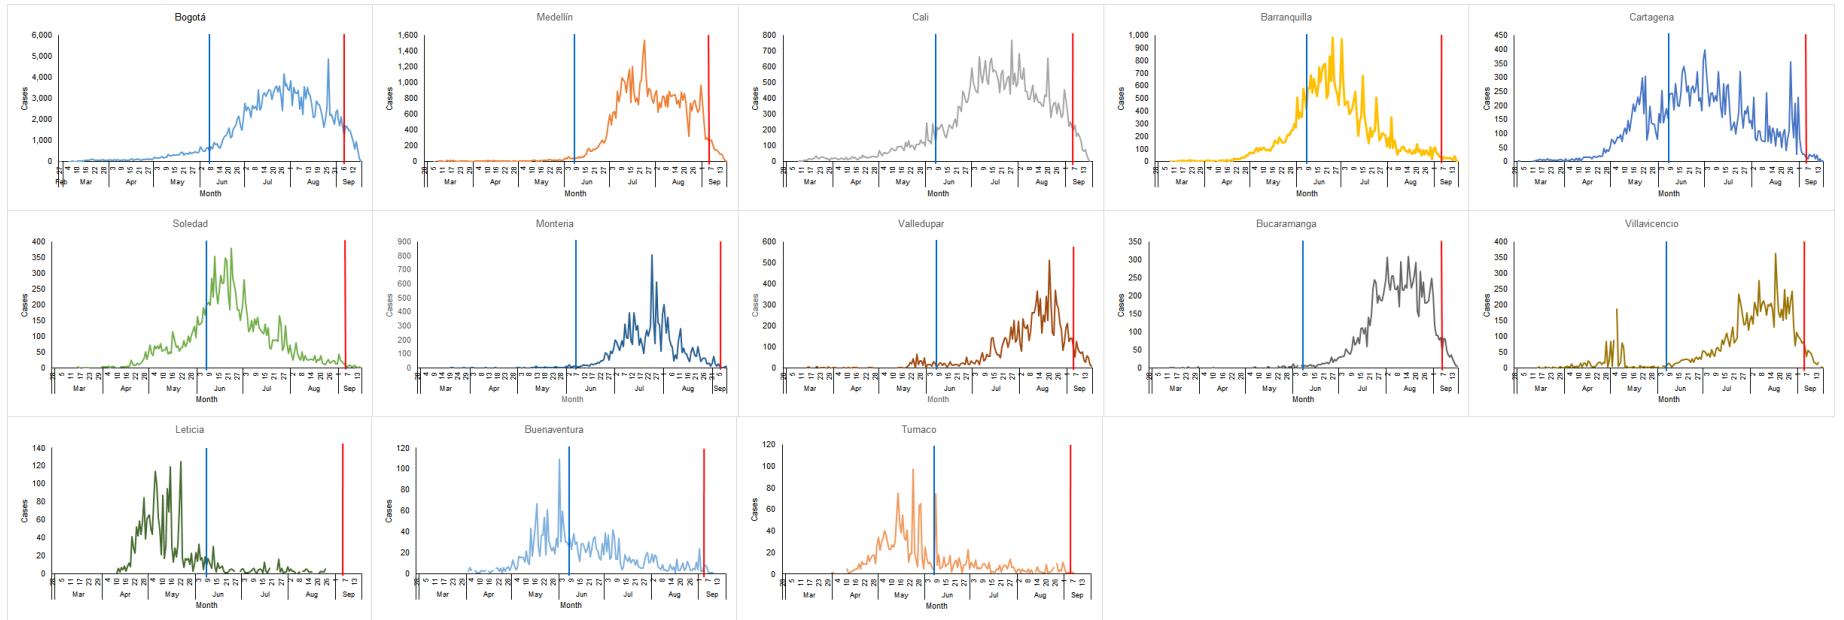

Source: https://medrxiv.org/content/medrxiv/early/2020/10/13/2020.10.09.20210187.full.pdf
